# Supplementary material for: Effectiveness of a Lifestyle Intervention in Patients with Type 2 Diabetes: The Physical Activity and Nutrition for Diabetes in Alberta (PANDA) Trial
Source: MDPI journal article supplement (doi:10.3390/healthcare4040073), 2016-09-27
Supplement: s1 [file s1]

# Supplementary Materials: Effectiveness of a Lifestyle Intervention in Patients with Type 2 Diabetes: The Physical Activity and Nutrition for Diabetes in Alberta (PANDA) Trial

Ghada Asaad, Diana C. Soria-Contreras, Rhonda C. Bell and Catherine B. Chan

**Table S1.** A one-day sample menu.

Table S1 A. Week 1, Day 1.

| Meal                                                                                        | Ingredients Per Serving                                                                                                                                                                                                                                   | Canada's Food Guide Servings                                                                                         |
|---------------------------------------------------------------------------------------------|-----------------------------------------------------------------------------------------------------------------------------------------------------------------------------------------------------------------------------------------------------------|----------------------------------------------------------------------------------------------------------------------|
| Breakfast<br>Breakfast Parfait<br>(see recipe, page 25 [1])                                 | ½ cup frozen berries<br>¼ cup low-fat granola<br>¾ cup low-fat yogurt<br>½ cup apple juice<br>1 cup coffee/tea<br>2 tbsp 1% milk (optional)<br>1 tsp sugar (optional)                                                                                     | 2 Vegetables and Fruit<br>1 Grain Products<br>1 Milk and Alternatives                                                |
| Morning Snack<br>Oat Bran Applesauce Muffins with Roasted Almonds (see recipe, page 26 [1]) | 1 oat bran applesauce muffin<br>1 tsp margarine<br>1 tbsp roasted almonds                                                                                                                                                                                 | 1 Grain Products<br>¼ Meat and Alternatives<br>1 Oils and Fats                                                       |
| Lunch<br>Tuna Caesar Sandwich (see recipe, page 27 [1])                                     | 2.5 oz white tuna<br>1 tbsp artichoke hearts<br>1 tbsp onion<br>1 tbsp fat-free mayonnaise<br>¾ tbsp Parmesan cheese<br>¼ cup each cucumber and tomato<br>½ cup lettuce<br>2 slices whole wheat toast<br>1 cup 1% milk<br>½ cup canned peaches (in water) | 2½ Vegetables and Fruit<br>2 Grain Products<br>1 Meat and Alternatives<br>1 Milk and Alternatives<br>1 Oils and Fats |
| Afternoon Snack<br>Hummus & Crackers (see recipe, page 28 [1])                              | ¼ cup hummus<br>6 Melba toast<br>¼ cup chopped tomatoes                                                                                                                                                                                                   | ½ Vegetables and Fruit<br>1½ Grain Products<br>½ Meat and Alternatives                                               |
| Dinner<br>Pork Tenderloin with Roasted Potatoes (see recipe, page 29 [1])                   | 4 oz pork tenderloin<br>¾ cup roasted potatoes<br>½ cup green beans<br>1 small whole grain dinner roll<br>1 tsp margarine<br>½ cup 1% milk                                                                                                                | 2 Vegetables and Fruit<br>1 Grain Products<br>1½ Meat & Alternatives<br>½ Milk and Alternatives<br>1 Oils and Fats   |
| Evening Snack<br>Cinnamon Raisin Toast                                                      | 1 slice toasted raisin bread<br>1 tsp margarine<br>1 tsp cinnamon<br>½ cup 1% milk                                                                                                                                                                        | 1 Grain Products<br>1 Milk and Alternatives<br>1 Oils and Fats                                                       |
| Total serving                                                                               |                                                                                                                                                                                                                                                           | 7½ Grain Products<br>3¼ Meat and Alternatives<br>3½ Milk and Alternatives<br>4 Oils and Fats                         |

Table S1 B. Good to Know.

| Nutrition Fact of the Day | Adjusting Today's Menu                                       |
|---------------------------|--------------------------------------------------------------|
| Calories: 1848            | To cut about 200 calories                                    |
| Fat: 49 g                 | • Have only ½ cup of yogurt at breakfast (saves 50 kcal)     |
| Saturated fat: 13 g       | • Omit margarine at morning snack and dinner (saves 70 kcal) |
| Carbohydrate: 262 g       | • Make an open-faced sandwich for lunch (saves 70 kcal)      |
| Fibre: 28 g               | To add about 200 calories                                    |
| Protein: 100 g            | • Have 2 tbsp almonds at morning snack (adds 50 kcal)        |
|                           | • Drink 1 cup of milk with your dinner (adds 50 kcal)        |
|                           | Have 2 slices of toast at evening snack (adds 100 kcal)      |

## Reference

1. Chan, C.B.; Bell, R.C. *Pure Prairie Eating Plan—Fresh Food, Practical Menus and a Healthy Lifestyle*; Division of Human Nutrition, University of Alberta: Edmonton, AB, Canada, 2013.

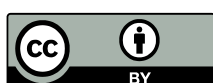

© 2016 by the authors. Submitted for possible open access publication under the terms and conditions of the Creative Commons Attribution (CC-BY) license (<http://creativecommons.org/licenses/by/4.0/>).
